# Supplementary material for: Optogenetic clustering and membrane translocation of the BcLOV4 photoreceptor
Source: PubMed Central journal article supplement — Proc Natl Acad Sci U S A. 2023 Aug 1;120(32):e2221615120. doi: 10.1073/pnas.2221615120 (PMC10410727; doi:10.1073/pnas.2221615120), 2023-08-01
Supplement: pnas.2221615120.sapp.pdf [file pnas.2221615120.sapp.pdf]

## **Supporting Information for** Optogenetic clustering and membrane translocation of the BcLOV4 photoreceptor

Ayush Aditya Pal<sup>#</sup>, William Benman<sup>#</sup>, Thomas R. Mumford, Zikang Huang, Brian Y. Chow, Lukasz J. Bugaj\*

<sup>#</sup>contributed equally

Correspondence to: Lukasz Bugaj  
Email: bugaj@seas.upenn.edu

### **This PDF file includes:**

Figures S1 to S7  
Tables S1 to S2  
Legends for Movies S1 to S5

### **Other supporting materials for this manuscript include the following:**

Movies S1 to S5

## Supplementary Figures

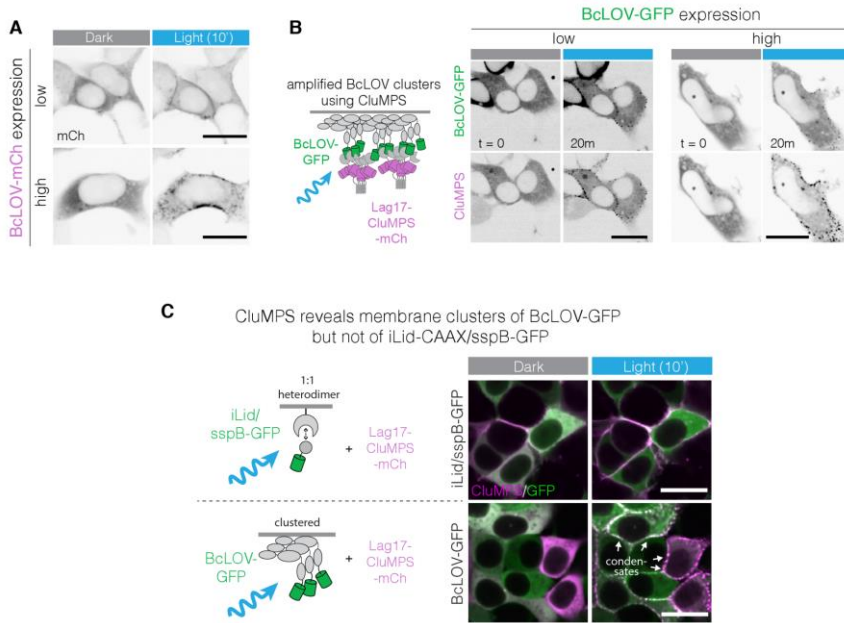

**Figure S1: Light-induced clustering of BcLOV4 at the plasma membrane.** **A)** Representative images of HEK 293T cells transiently transfected with BcLOV-mCherry under 40X confocal microscopy. In cells with high expression, light-induced aggregation at the plasma membrane could be observed. Scale bar = 20  $\mu$ m. **B)** Representative images of cells co-expressing BcLOV-GFP with a CluMPS reporter of GFP clustering (LaG17-CluMPS). Light-activated BcLOV4 demonstrated both membrane-association and condensate formation even with low levels of BcLOV4 expression. Scale bar = 20  $\mu$ m. **C)** Representative images of membrane association and clustering of GFP when recruited by either iLid/sspB (1:1 heterodimer) or BcLOV4 in the presence of the CluMPS reporter. Light-induced recruitment through BcLOV4 resulted in membrane-associated GFP condensates, whereas recruitment through heterodimerization did not, suggesting that clustering and CluMPS activation is not simply a result of membrane translocation. Scale bars = 20  $\mu$ m.

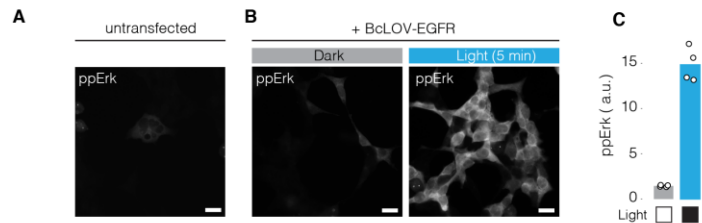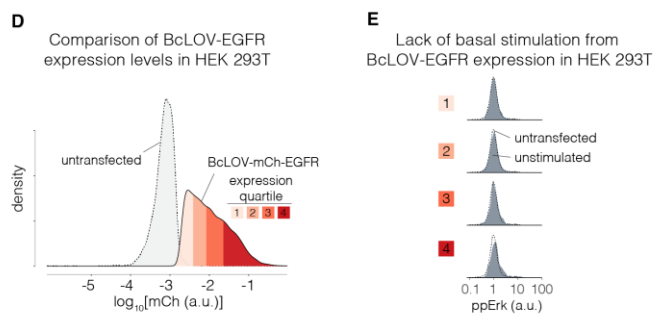

**F** NIH 3T3 cells do not have detectable endogenous EGFR

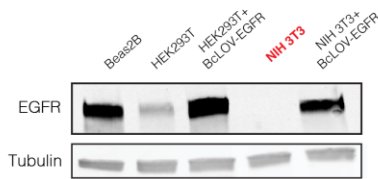

**G** densitometry

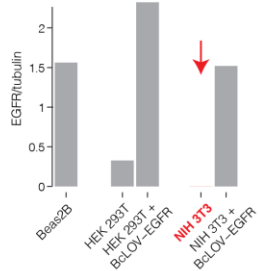

BcLOV-EGFR activity does not require endogenous EGFR

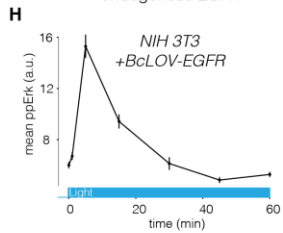

BcLOV-EGFR activity levels depend on expression levels in NIH 3T3 cells

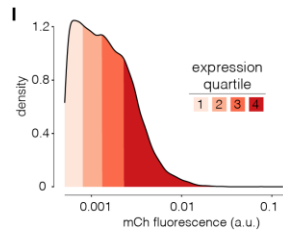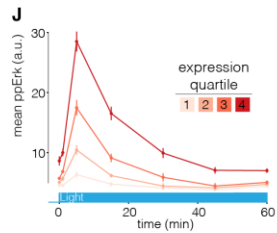

**Figure S2: Optogenetic stimulation of Ras-Erk signaling using BcLOV-EGFR.** Representative images of ppErk signal from untransfected HEK 293T cells (**A**) as well as from cells transfected with BcLOV-EGFR and kept in the dark or illuminated with 5 min of blue light (**B**). Scale bars = 20  $\mu$ m. **C**) Quantification of ppErk immunofluorescence resulting from 5 min of optogenetic stimulation of BcLOV-EGFR. Data represent mean ppErk intensity from four replicates. Each replicate represents the mean of ~100 cells. See **Table S1** for details of optogenetic stimulation. **D**) Visualization of expression level bins of BcLOV-EGFR vs untransfected HEK 293Ts. **E**) Single cell distributions of Erk activity in expressing (dark-state) vs non-expressing HEK 293T cells. Plots show no elevation of basal signaling resulting from probe expression. **F**) Western blot for EGFR in various cell lines shows low EGFR in HEK 293T cells and undetectable levels of EGFR in NIH 3T3 cells. Cell lines in lanes 3 and 5 were engineered to stably express BcLOV-EGFR. Beas2B is a lung epithelial cell line with strong native EGFR expression. **G**) Densitometry of Western blot in (**F**). **H**) Activation of stably-expressed BcLOV-EGFR in NIH 3T3 cells, as assessed by single-cell immunofluorescence staining for ppErk. Data show that BcLOV-EGFR can be activated in the absence of endogenous EGFR. Data represents the mean  $\pm$  SEM of four replicates, with each replicate representing the mean of ~600-1200 cells. **I**) Single-cell mean expression levels of BcLOV-EGFR for cells used in (**H**). Colors represent expression quartiles. **J**) Immunofluorescence data from (**H**) visualized by expression level demonstrate expression-dependent activation amplitude, as seen for transiently-transfected HEK 293T cells (**Figure S3E**). Data represents the mean  $\pm$  SEM of four replicates, with each replicate representing the mean of ~150-300 cells per expression quartile. See **Table S1** for details of optogenetic stimulation parameters.

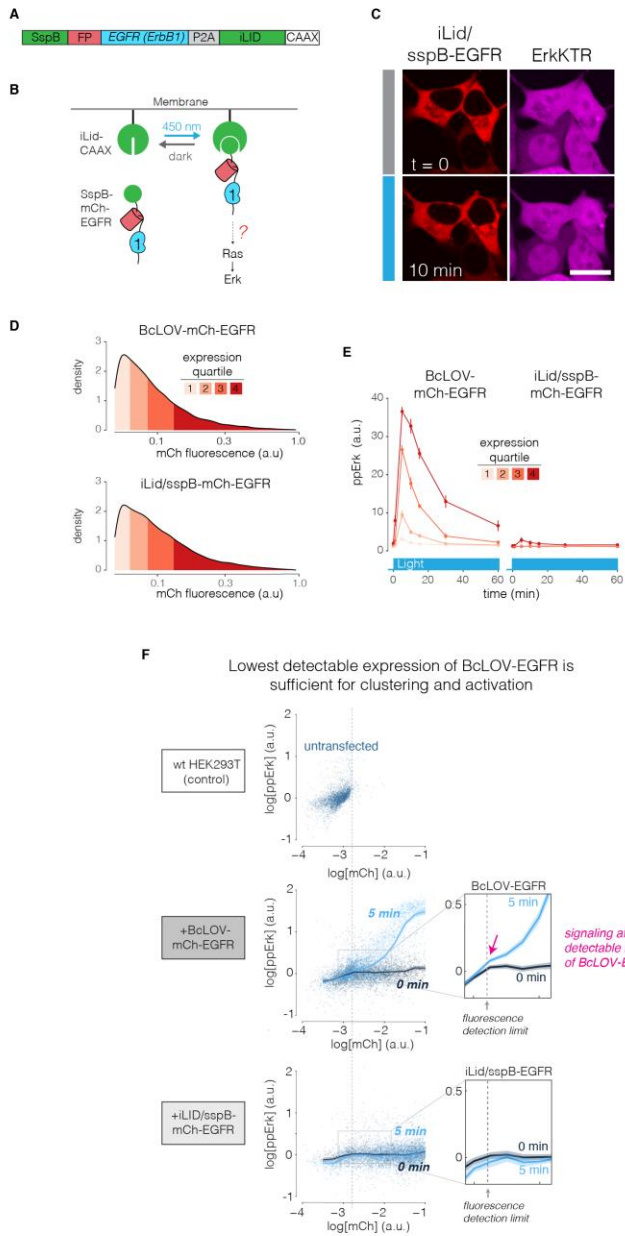

**Figure S3: Membrane recruitment of the EGFR intracellular domain is not sufficient to activate downstream signaling.** **A)** Schematic of iLID-CAAX/sspB-EGFR fusion construct. **B)** We asked whether light-induced recruitment of the EGFR intracellular domain to the plasma membrane was sufficient to activate downstream Ras-Erk signaling. **C)** Representative images of sspB-EGFR and ErkKTR-miRFP in HEK 293T cells in the presence and absence of light. Erk activation was not observed upon light stimulation. Scale bar = 20  $\mu\text{m}$ . **D)** Single-cell mean expression levels of BcLOV- or iLid/sspB-based EGFR tools. Colors represent expression quartiles. **E)** Immunofluorescence of ppErk levels downstream of either BcLOV-EGFR or iLid/sspB-EGFR after light stimulation, separated by expression level. Expression-level-dependent stimulation was observed for BcLOV-EGFR. By comparison, no signaling was observed for iLid/sspB-EGFR except for a small amount at the very highest expression levels. Data represents the mean  $\pm$  SEM of four replicates, with each replicate representing the mean of  $\sim$ 10-120 cells per expression quartile. See **Supplementary Table 1** for details of optogenetic stimulation parameters. **F)** Visualization of ppErk activation as a function of probe expression in single cells. Top plot shows mCh autofluorescence in untransfected HEK 293T cells which was used to set the minimum threshold for mCh-expressing cells (dashed line). Middle and bottom panels show the same for HEK 293T cells that transiently expressed BcLOV-EGFR and iLID/sspB-EGFR. Data shows unstimulated cells (black) and cells stimulated with 5 minutes of blue light (blue). Solid lines represent a rolling average of ppErk across construct expression levels. Ribbons represent the 95% confidence interval. Data show elevated ppErk, and thus stimulated and clustered BcLOV-EGFR, at all expression levels, including at the mCherry detection limit. No activation was observed in cells expressing iLID/sspB-EGFR.

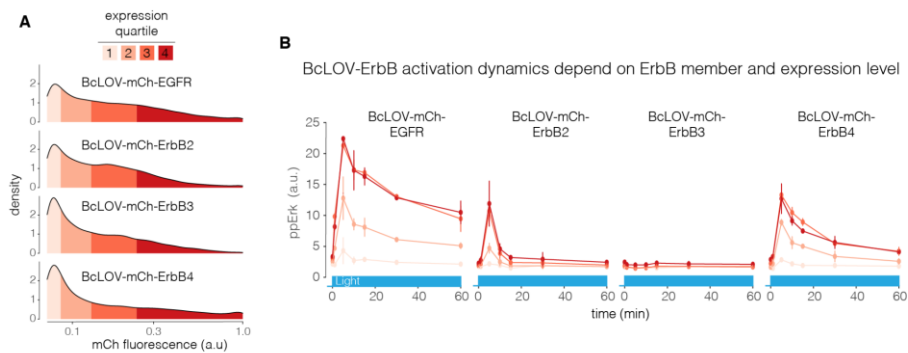

**Figure S4: ppErk dynamics downstream of BcLOV-ErbB stimulation depend on the ErbB family member and on the expression level of the probe. A)** Single-cell mean expression levels of BcLOV-ErbB tools. Colors represent expression quartiles. **B)** Comparison of differential magnitude, dynamics, and duration of ppErk signaling downstream of each ErbB member, visualized as a function of expression level. Data represent the mean  $\pm$  SEM of two replicates, with each replicate representing the mean of  $\sim$ 200-800 cells per expression quartile. See **Table S1** for optogenetic stimulation parameters.

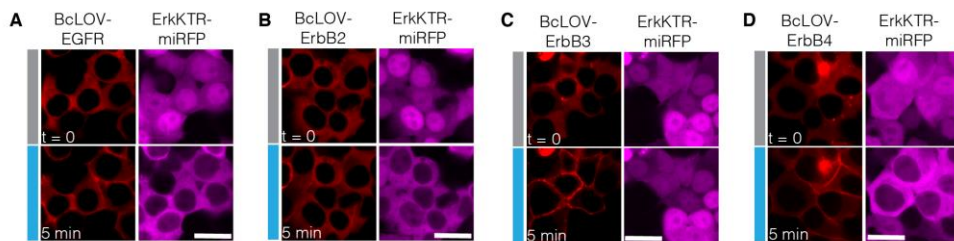

**Figure S5: ErkKTR stimulation by BcLOV-ErbB1-4.** Representative images of the ErkKTR-miRFP reporter in HEK 293T cells that were transiently transfected with BcLOV-ErbB1-4. Scale bars = 20  $\mu$ m. See **Table S1** for optogenetic stimulation parameters.



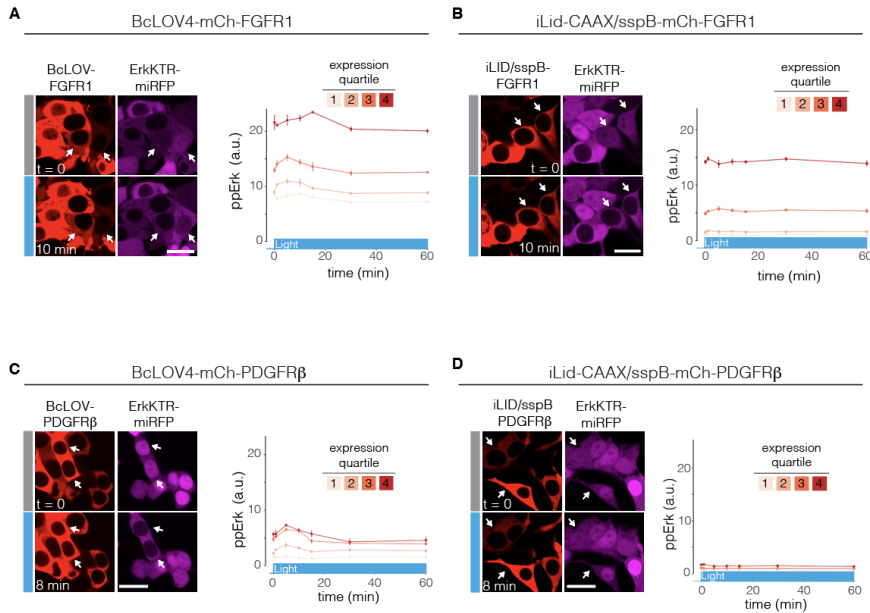

**Figure S6: Stimulation of FGFR1 and PDGFR $\beta$  with BcLOV4 and comparison with stimulation through 1:1 heterodimeric recruitment to the plasma membrane. A)** Stimulation of FGFR1 signaling with BcLOV4. Representative images (left) of the ErkKTR-miRFP reporter in HEK 293T cells that were transiently transfected with BcLOV-FGFR1. Light-induced ErkKTR stimulation can be observed only in low-expressing cells (white arrows). High-expressing cells show constitutively high Erk activity even in the absence of light. Immunofluorescence for ppErk (right) confirms expression-level dependence of basal levels and light-induced signaling. **B)** Stimulation of FGFR signaling through membrane recruitment with 1:1 heterodimerization of iLid/sspB. Representative images (left) of ErkKTR activity in HEK 293T cells that express iLid-CAAX/sspB-FGFR1. Here, membrane recruitment can stimulate the pathway at intermediate-high expression levels (white arrows). As in **(A)**, high-expressing cells show constitutive activity even in the dark ( $t = 0$ ). Immunofluorescence (right) confirms basal Erk activity for cells at high expression levels. **C)** Stimulation of PDGFR $\beta$  signaling with BcLOV4. Representative images (left) of the ErkKTR-miRFP reporter in HEK 293T cells that were transiently transfected with BcLOV-PDGFR $\beta$ . Light-induced ErkKTR stimulation can be observed only in mid-high-expressing cells (white arrows). High-expressing cells show constitutively high Erk activity even in the absence of light. Immunofluorescence for ppErk (right) shows expression-level dependence on Erk phosphorylation. **D)** Stimulation of PDGFR $\beta$  signaling through membrane recruitment with 1:1 heterodimerization of iLid/sspB. Representative images (left) of ErkKTR activity in HEK 293T cells that express iLid-CAAX/sspB-PDGFR $\beta$ . Unlike for FGFR1, membrane recruitment does not stimulate PDGFR $\beta$  and downstream Erk activity (white arrows). Scale bars = 20  $\mu$ m. Immunofluorescence (right) confirms no Erk activation across all expression levels. For immunofluorescence, data represents the mean  $\pm$  SEM of two replicates, with each replicate representing the mean of  $\sim$ 100-600 cells per expression quartile. See **Table S1** for details of optogenetic illumination parameters.

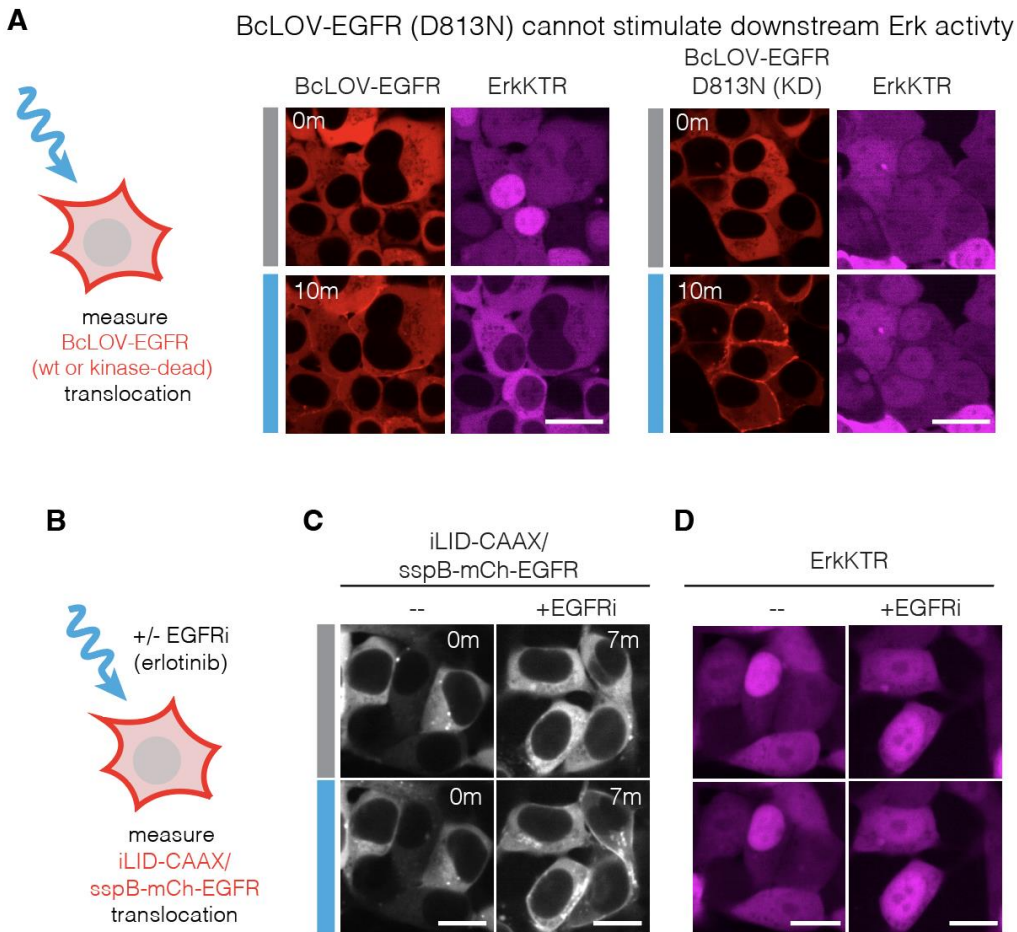

**Figure S7: Inhibition of EGFR kinase activity enhances translocation of the EGFR domain. A)** The ErkKTR reporter confirms that light-induced translocation of EGFR(D813N) cannot activate Ras-Erk signaling. Scale bar = 20  $\mu\text{m}$ . **B)** HEK 293T cells expressing iLID-CAAX/sspB-mCh-EGFR were treated with 1  $\mu\text{M}$  erlotinib (EGFR inhibitor) prior to blue-light stimulation, and membrane translocation and ErkKTR activity was observed in untreated and drug-treated conditions. **C)** In untreated cells, minimal membrane translocation could be observed. However, in cells treated with erlotinib, clear translocation was observed in response to light stimulation. **C)** Corresponding ErkKTR-miRFP images for cells in **(B)**. ErkKTR activity could not be observed even with observable sspB-EGFR recruitment due to inhibition of the EGFR kinase.

## Supplementary Movie Captions

### **Movie S1. CluMPS amplifies and visualizes membrane-associated BcLOV4 condensates.**

Confocal imaging of BcLOV-GFP translocation with or without CluMPS in HEK 293T cells upon stimulation with 488 nm light. Time is in minutes:seconds. Blue square indicates light stimulation. Scale bar = 10  $\mu$ m.

**Movie S2. The Ras-Erk pathway was activated in cells by BcLOV-EGFR.** Confocal imaging of BcLOV-EGFR translocation and activation of ErkKTR-miRFP in HEK 293T cells upon stimulation with 488 nm light. Blue square indicates light stimulation.

**Movie S3. Magnitude of membrane translocation differs between fusions of ErbB family members with BcLOV4.** Confocal imaging of BcLOV-mCh-ErbB1-4 translocation to the membrane upon blue light stimulation with 488 nm light. Blue square indicates light stimulation.

**Movie S4. ErbB activity correlates with membrane ruffling.** Confocal imaging of BcLOV-mCh-ErbB1-4 translocation and induced membrane ruffling upon stimulation with 488 nm light. Blue square indicates light stimulation.

**Movie S5. Disordered domains increase light-induced membrane translocation of BcLOV4.** Confocal imaging of IDR-fused variants of BcLOV-mCh in HEK 293T cells upon stimulation with 488 nm light. Blue square indicates light stimulation.

Supplementary Table S1

| Illumination and culture conditions for all experiments |           |            |                       |         |          |            |                 |
|---------------------------------------------------------|-----------|------------|-----------------------|---------|----------|------------|-----------------|
| Figure                                                  | Temp (°C) | Duty Cycle | Intensity             | ON time | OFF time | Humidified | CO <sub>2</sub> |
| 1B                                                      | 37        | 3.3%       | 1.45W/cm <sup>2</sup> | 1s      | 30s      | Yes        | 5%              |
| 1D                                                      | 37        | 3.3%       | 1.45W/cm <sup>2</sup> | 1s      | 30s      | Yes        | 5%              |
| 2C                                                      | 37        | 3.3%       | 1.45W/cm <sup>2</sup> | 1s      | 30s      | Yes        | 5%              |
| 2D                                                      | 37        | 3.3%       | 1.45W/cm <sup>2</sup> | 1s      | 30s      | Yes        | 5%              |
| 2E                                                      | 25,37     | 10%        | 160mW/cm <sup>2</sup> | 0.5s    | 5s       | Yes        | 5%              |
| 2F-G                                                    | 37        | Variable   | 160mW/cm <sup>2</sup> | 0.5s    | Variable | Yes        | 5%              |
| 3B                                                      | 37        | 3.3%       | 1.45W/cm <sup>2</sup> | 1s      | 30s      | Yes        | 5%              |
| 3C                                                      | 37        | 2.5%       | 160mW/cm <sup>2</sup> | 0.5s    | 20s      | Yes        | 5%              |
| 3D                                                      | 37        | 2.5%       | 160mW/cm <sup>2</sup> | 0.5s    | 20s      | Yes        | 5%              |
| 3E                                                      | 37        | 3.3%       | 1.45W/cm <sup>2</sup> | 1s      | 30s      | Yes        | 5%              |
| 3F                                                      | 37        | 3.3%       | 1.45W/cm <sup>2</sup> | 1s      | 30s      | Yes        | 5%              |
| 4B                                                      | 37        | 3.3%       | 1.45W/cm <sup>2</sup> | 1s      | 30s      | Yes        | 5%              |
| 4C                                                      | 37        | 3.3%       | 1.45W/cm <sup>2</sup> | 1s      | 30s      | Yes        | 5%              |
| 5B                                                      | 37        | 3.3%       | 1.45W/cm <sup>2</sup> | 1s      | 30s      | Yes        | 5%              |
| 5C                                                      | 37        | 100%       | Variable              | const.  | ----     | Yes        | 5%              |
| 5D-E                                                    | 37        | Variable   | 160mW/cm <sup>2</sup> | 0.5s    | Variable | Yes        | 5%              |
| 5F                                                      | 37        | 2.5%       | 160mW/cm <sup>2</sup> | 0.5s    | 20s      | Yes        | 5%              |
| 6B                                                      | 37        | 3.3%       | 1.45W/cm <sup>2</sup> | 1s      | 30s      | Yes        | 5%              |
| 6C                                                      | 37        | 3.3%       | 1.45W/cm <sup>2</sup> | 1s      | 30s      | Yes        | 5%              |
| 6D                                                      | 37        | 100%       | Variable              | const.  | ----     | Yes        | 5%              |
| 6E                                                      | 37        | 100%       | Variable              | const.  | ----     | Yes        | 5%              |
| 6F                                                      | 37        | 20%        | 160mW/cm <sup>2</sup> | 0.5s    | 2.5s     | Yes        | 5%              |
| S1                                                      | 37        | 3.3%       | 1.45W/cm <sup>2</sup> | 1s      | 30s      | Yes        | 5%              |
| S2A-E                                                   | 37        | 5%         | 160mW/cm <sup>2</sup> | 0.5s    | 10s      | Yes        | 5%              |
| S2H,J                                                   | 37        | 5%         | 160mW/cm <sup>2</sup> | 0.5s    | 10s      | Yes        | 5%              |

Formatted Table

|                        |    |      |                       |      |     |     |    |
|------------------------|----|------|-----------------------|------|-----|-----|----|
| S3C                    | 37 | 3.3% | 1.45W/cm <sup>2</sup> | 1s   | 30s | Yes | 5% |
| S3E,F                  | 37 | 5%   | 160mW/cm <sup>2</sup> | 0.5s | 10s | Yes | 5% |
| S4-B                   | 37 | 2.5% | 160mW/cm <sup>2</sup> | 0.5s | 20s | Yes | 5% |
| S5                     | 37 | 3.3% | 1.45W/cm <sup>2</sup> | 1s   | 30s | Yes | 5% |
| S6 (Live-cell Imaging) | 37 | 3.3% | 1.45W/cm <sup>2</sup> | 1s   | 30s | Yes | 5% |
| S6 (IF)                | 37 | 2.5% | 160mW/cm <sup>2</sup> | 0.5s | 20s | Yes | 5% |
| S7                     | 37 | 3.3% | 1.45W/cm <sup>2</sup> | 1s   | 30s | Yes | 5% |
| SM1                    | 37 | 3.3% | 1.45W/cm <sup>2</sup> | 1s   | 30s | Yes | 5% |
| SM2                    | 37 | 3.3% | 1.45W/cm <sup>2</sup> | 1s   | 30s | Yes | 5% |
| SM3                    | 37 | 3.3% | 1.45W/cm <sup>2</sup> | 1s   | 30s | Yes | 5% |
| SM4                    | 37 | 3.3% | 1.45W/cm <sup>2</sup> | 1s   | 30s | Yes | 5% |
| SM5                    | 37 | 3.3% | 1.45W/cm <sup>2</sup> | 1s   | 30s | Yes | 5% |

**Supplementary Table S2. Constructs used in this study**

| <b>Construct</b>                         | <b>Backbone + Promoter</b> |
|------------------------------------------|----------------------------|
| BcLOV-GFP                                | pHR CMV                    |
| SspB-GFP-2A-iLID-CAAX                    | pHR CMV                    |
| LaG17-mCh-HOTag3                         | pHR PGK                    |
| ErkKTR-miRFP670                          | pHR SFFV                   |
| BcLOV-mCherry-EGFR/ErbB1                 | pHR CMV                    |
| BcLOV-mCherry-ErbB2                      | pHR CMV                    |
| BcLOV-mCherry-ErbB3                      | pHR CMV                    |
| BcLOV-mCherry-ErbB4                      | pHR CMV                    |
| BcLOV-mCherry-EGFR D813N (KD)            | pHR CMV                    |
| SspB-mCherry-EGFR-2A-iLID-CAAX           | pHR CMV                    |
| BcLOV-mCherry-FGFR                       | pHR CMV                    |
| BcLOV-mCherry-PDGFR $\beta$              | pHR CMV                    |
| SspB-mCherry-FGFR-2A-iLID-CAAX           | pHR CMV                    |
| SspB-mCherry-PDGFR-2A-iLID-CAAX          | pHR CMV                    |
| BcLOV-mCherry                            | pcDNA3.1 CMV               |
| FUS(LC)-BcLOV-mCherry                    | pcDNA3.1 CMV               |
| RGG-BcLOV-mCherry                        | pcDNA3.1 CMV               |
| FUS(LC)-BcLOV-mCherry-EGFR               | pHR CMV                    |
| RGG-BcLOV-mCherry-EGFR                   | pHR CMV                    |
| BcLOV-mCherry-SOS <sub>cat</sub>         | pHR SFFV                   |
| FUS(LC)-BcLOV-mCherry-SOS <sub>cat</sub> | pHR SFFV                   |
| RGG-BcLOV-mCherry-SOS <sub>cat</sub>     | pHR SFFV                   |
| GFP-CAAX                                 | pHR CMV                    |
